# Supplementary material for: Nanofiller graphene–ZnO hybrid nanoarchitecture: optical, electrical and optoelectronic investigation
Source: Royal Society of Chemistry journal article supplement (doi:10.1039/c5tc02729b), 2015-01-01
Supplement: c5tc02729b1.pdf [file c5tc02729b1.pdf]

### Supporting Information's

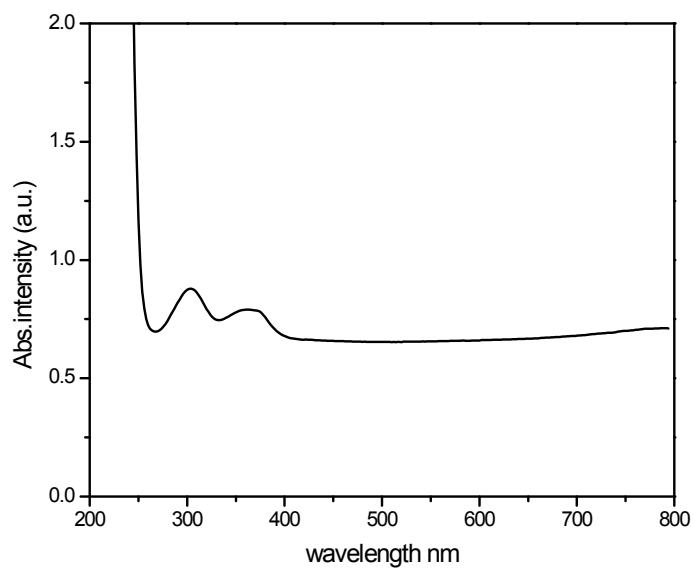

Figure 1 absorption spectra for ZnO NRAs

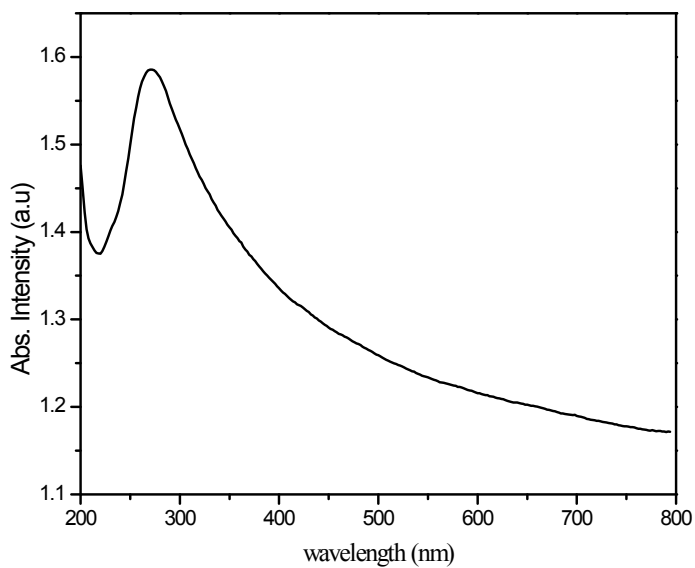

Figure 2 absorption spectra for graphene
